# Supplementary material for: Dual emissive Ln(iii)–Ag(i) heterometallic chains based on tris(2-pyridyl)phosphine oxide
Source: Royal Society of Chemistry journal article supplement (doi:10.1039/d4nj00617h), 2024-01-01
Supplement: d4nj00617h1.pdf [file d4nj00617h1.pdf]

*Supporting Information*

**Dual emissive Ln(III)–Ag(I) heterometallic chains based on tris(2-pyridyl)phosphine oxide**

**Yuliya A. Bryleva,<sup>1</sup> Mariana I. Rakhmanova, Alexander V. Artem'ev,  
Andrey Yu. Baranov, and Ludmila A. Glinskaya**

*Nikolaev Institute of Inorganic Chemistry, Siberian Branch of the Russian Academy of Sciences,  
3, Academician Lavrentiev Avenue, Novosibirsk 630090, Russian Federation*

---

<sup>1</sup>Corresponding author

E-mail address: [bryleva@niic.nsc.ru](mailto:bryleva@niic.nsc.ru) (Yu. A. Bryleva)

## Contents

|                                                                                                                                                            |    |
|------------------------------------------------------------------------------------------------------------------------------------------------------------|----|
| <b>Table S1.</b> Selected bond lengths and angles for <b>2·3MeCN</b> and <b>3·3MeCN</b> . .....                                                            | 3  |
| <b>Table S2.</b> Unit cell parameters of CPs ( <b>1–4</b> )·3MeCN measured at 150 K. ....                                                                  | 6  |
| <b>Table S3.</b> The room-temperature photoluminescence lifetimes of CPs <b>1–4</b> before and after irradiation at 312 nm for 3 hours. ....               | 7  |
| <b>Figure S1.</b> FT-IR spectra of Py <sub>3</sub> PO and CPs <b>1–4</b> . ....                                                                            | 8  |
| <b>Figure S2.</b> TG, DTA, and DTG of CPs <b>1–4</b> . ....                                                                                                | 9  |
| <b>Figure S3.</b> Simulated XRPD patterns of <b>2·3MeCN</b> and <b>3·3MeCN</b> and experimental ones of CPs ( <b>1–4</b> )·3MeCN recorded at 150 K. ....   | 10 |
| <b>Figure S4.</b> Fragment of the crystal structure of <b>2·3MeCN</b> . ....                                                                               | 11 |
| <b>Figure S5.</b> View of the crystal structure of <b>2·3MeCN</b> along the [100] direction. ....                                                          | 12 |
| <b>Figure S6.</b> View of the crystal structure of <b>2·3MeCN</b> along the [010] direction. ....                                                          | 13 |
| <b>Figure S7.</b> View of the crystal structure of <b>2·3MeCN</b> along the [001] direction. ....                                                          | 14 |
| <b>Figure S8.</b> Diffuse reflectance spectra of CPs <b>1–4</b> and Py <sub>3</sub> PO. ....                                                               | 15 |
| <b>Figure S9.</b> Normalized excitation spectra of CPs <b>1–4</b> in the solid state at 300 K. ....                                                        | 16 |
| <b>Figure S10.</b> PL excitation and emission spectra of Py <sub>3</sub> PO in the solid state at 300 K. ....                                              | 17 |
| <b>Figure S11.</b> Emission spectra of CPs <b>1–4</b> recorded at $\lambda_{\text{ex}} = 320$ nm (red) and 350 nm (blue) in the solid state at 300 K. .... | 18 |
| <b>Figure S12.</b> CIE 1931 chromaticity diagrams demonstrating dependence of the emission color of CPs <b>1–4</b> on the excitation wavelength. ....      | 19 |
| <b>Figure S13.</b> Kinetics of PL decay of CPs <b>1–4</b> in the solid state at 300 K. ....                                                                | 20 |
| <b>Figure S14.</b> Emission spectra of CPs <b>1–4</b> before and after irradiation at 312 nm for 3 hours in the solid state at 300 K. ....                 | 21 |

**Table S1.** Selected bond lengths and angles for **2**·3MeCN and **3**·3MeCN.

| 2·3MeCN  |                 |                        |                 | 3·3MeCN  |                 |                        |                 |
|----------|-----------------|------------------------|-----------------|----------|-----------------|------------------------|-----------------|
| Bond     | Bond length (Å) | Bond                   | Bond length (Å) | Bond     | Bond length (Å) | Bond                   | Bond length (Å) |
| Eu1–O1   | 2.363(4)        | Ag1–N1A <sup>iii</sup> | 2.494(7)x2      | Tb1–O1   | 2.334(3)        | Ag1–N1A <sup>ii</sup>  | 2.482(5)x2      |
| Eu1–O2   | 2.354 (4)       | Ag1–N1B <sup>iii</sup> | 2.468(7)x2      | Tb1–O2   | 2.327(3)        | Ag1–N1B <sup>ii</sup>  | 2.473(5)x2      |
| Eu1–O11  | 2.450(5)        | Ag1–N1C <sup>iii</sup> | 2.487(7)x2      | Tb1–O11  | 2.425(3)        | Ag1–N1C <sup>ii</sup>  | 2.484(5)x2      |
| Eu1–O12  | 2.504(5)        | Ag2–N1D <sup>i</sup>   | 2.503(7)x2      | Tb1–O12  | 2.481(4)        | Ag2–N1D <sup>i</sup>   | 2.504(5)x2      |
| Eu1–O21  | 2.516(7)        | Ag2–N1E <sup>i</sup>   | 2.412(6)x2      | Tb1–O21  | 2.491(8)        | Ag2–N1E <sup>i</sup>   | 2.407(5)x2      |
| Eu1–O22  | 2.510(6)        | Ag2–N1F <sup>i</sup>   | 2.647(8)x2      | Tb1–O21' | 2.535(11)       | Ag2–N1F <sup>i</sup>   | 2.665(6)x2      |
| Eu1–O31  | 2.507(9)        | Ag3–N1G                | 2.525(6)        | Tb1–O22  | 2.504(11)       | Ag3–N1G <sup>iii</sup> | 2.522(4)        |
| Eu1–O31' | 2.505(15)       | Ag3–N1H                | 2.455(7)        | Tb1–O22' | 2.509(13)       | Ag3–N1H <sup>iii</sup> | 2.456(5)        |
| Eu1–O32  | 2.492(9)        | Ag3–N1I                | 2.473(7)        | Tb1–O31  | 2.486(7)        | Ag3–N1I <sup>iii</sup> | 2.469(5)        |
| Eu1–O32' | 2.520(16)       | Ag3–N1J <sup>ii</sup>  | 2.529(7)        | Tb1–O31' | 2.485(11)       | Ag3–N1J                | 2.539(5)        |
| Eu1–O41  | 2.557(7)        | Ag3–N1K <sup>ii</sup>  | 2.518(7)        | Tb1–O32  | 2.476(7)        | Ag3–N1K                | 2.509(5)        |
| Eu1–O42  | 2.516(6)        | Ag3–N1O <sup>ii</sup>  | 2.445(7)        | Tb1–O32' | 2.477(12)       | Ag3–N1O                | 2.445(5)        |
| Eu2–O3   | 2.351(4)        |                        |                 | Tb1–O41  | 2.547(5)        |                        |                 |
| Eu2–O4   | 2.361 (4)       |                        |                 | Tb1–O42  | 2.496(5)        |                        |                 |
| Eu2–O51  | 2.488(7)        |                        |                 | Tb2–O3   | 2.327(3)        |                        |                 |
| Eu2–O52  | 2.539(6)        |                        |                 | Tb2–O4   | 2.331(3)        |                        |                 |
| Eu2–O61  | 2.488(10)       |                        |                 | Tb2–O51  | 2.473(5)        |                        |                 |
| Eu2–O61' | 2.525(12)       |                        |                 | Tb2–O52  | 2.521(5)        |                        |                 |
| Eu2–O62  | 2.533(10)       |                        |                 | Tb2–O61  | 2.472(7)        |                        |                 |
| Eu2–O62' | 2.514(13)       |                        |                 | Tb2–O61' | 2.504(10)       |                        |                 |
| Eu2–O71  | 2.549(11)       |                        |                 | Tb2–O62  | 2.521(7)        |                        |                 |
| Eu2–O71' | 2.527(12)       |                        |                 | Tb2–O62' | 2.491(11)       |                        |                 |
| Eu2–O72  | 2.546(13)       |                        |                 | Tb2–O71  | 2.499(10)       |                        |                 |
| Eu2–O72' | 2.549(14)       |                        |                 | Tb2–O71' | 2.519(15)       |                        |                 |
| Eu2–O81  | 2.474(5)        |                        |                 | Tb2–O72  | 2.512(11)       |                        |                 |
| Eu2–O82  | 2.495(5)        |                        |                 | Tb2–O72' | 2.529(15)       |                        |                 |
|          |                 |                        |                 | Tb2–O81  | 2.445(4)        |                        |                 |
|          |                 |                        |                 | Tb2–O82  | 2.469(4)        |                        |                 |

| Angle       | Angle size (°) | Angle                                     | Angle size (°) | Angle       | Angle size (°) | Angle                                      | Angle size (°) |
|-------------|----------------|-------------------------------------------|----------------|-------------|----------------|--------------------------------------------|----------------|
| O1–Eu1–O11  | 76.7(2)        | N1B–Ag1–N1C                               | 79.4(3)x2      | O1–Tb1–O11  | 77.0(2)        | N1A–Ag1–N1C                                | 83.6(2)x2      |
| O1–Eu1–O12  | 74.7(2)        | N1B <sup>iii</sup> –Ag1–N1C               | 94.9(2)x2      | O1–Tb1–O12  | 74.8(2)        | N1A–Ag1–N1C <sup>ii</sup>                  | 100.9(2)x2     |
| O1–Eu1–O21  | 69.3(2)        | N1B <sup>iii</sup> –Ag1–N1A               | 177.0(2)x2     | O1–Tb1–O21  | 71.2(4)        | N1A <sup>ii</sup> –Ag1–N1A                 | 101.4(2)       |
| O1–Eu1–O22  | 114.1(2)       | N1B–Ag1–N1A                               | 82.4(2)x2      | O1–Tb1–O21' | 66.5(3)        | N1B–Ag1–N1A                                | 82.1(2)x2      |
| O1–Eu1–O31  | 81.2(2)        | N1C–Ag1–N1A                               | 83.5(2)x2      | O1–Tb1–O22  | 112.5(5)       | N1B–Ag1–N1A <sup>ii</sup>                  | 176.5(2)x2     |
| O1–Eu1–O31' | 82.0(4)        | N1C <sup>iii</sup> –Ag1–N1A               | 101.9(2)x2     | O1–Tb1–O22' | 116.7(3)       | N1B–Ag1–N1C                                | 79.7(2)x2      |
| O1–Eu1–O32  | 128.5(3)       | N1A–Ag1–N1A <sup>iii</sup>                | 100.4(3)       | O1–Tb1–O31  | 81.4(2)        | N1B–Ag1–N1C <sup>ii</sup>                  | 95.5(2)x2      |
| O1–Eu1–O41  | 69.8(2)        | N1B <sup>iii</sup> –Ag1–N1B               | 94.8(3)        | O1–Tb1–O31' | 82.2(3)        | N1B <sup>ii</sup> –Ag1–N1B                 | 94.4(2)        |
| O1–Eu1–O42  | 118.1(2)       | N1C–Ag1–N1C <sup>iii</sup>                | 171.7(4)       | O1–Tb1–O32  | 129.1(2)       | N1C <sup>ii</sup> –Ag1–N1C                 | 173.0(3)       |
| O1–Eu1–O2   | 148.3(2)       | N1D <sup>i</sup> –Ag2–N1F                 | 106.3(2)x2     | O1–Tb1–O32' | 130.2(3)       | N1D–Ag2–N1F                                | 85.9(2)x2      |
| O2–Eu1–O11  | 77.0(2)        | N1E–Ag2–N1D <sup>i</sup>                  | 172.5(3)x2     | O1–Tb1–O41  | 69.4(2)        | N1D–Ag2–N1F <sup>i</sup>                   | 106.8(2)x2     |
| O2–Eu1–O12  | 75.2(2)        | N1D <sup>i</sup> –Ag2–N1F <sup>i</sup>    | 85.6(2)x2      | O1–Tb1–O42  | 117.9(2)       | N1D <sup>i</sup> –Ag2–N1D                  | 91.8(2)        |
| O2–Eu1–O21  | 116.4(2)       | N1E–Ag2–N1D                               | 82.7(2)x2      | O2–Tb1–O1   | 148.4(1)       | N1E–Ag2–N1D                                | 82.7(1)x2      |
| O2–Eu1–O22  | 67.6(2)        | N1E–Ag2–N1F                               | 78.1(2)x2      | O2–Tb1–O11  | 76.7(1)        | N1E–Ag2–N1D <sup>i</sup>                   | 172.5(2)x2     |
| O2–Eu1–O31  | 130.3(3)       | N1E–Ag2–N1F <sup>i</sup>                  | 91.4(2)x2      | O2–Tb1–O12  | 75.3(3)        | N1E–Ag2–N1F                                | 77.9(2)x2      |
| O2–Eu1–O31' | 128.7(3)       | N1D <sup>i</sup> –Ag2–N1D                 | 91.5(3)        | O2–Tb1–O21  | 118.0(2)       | N1E–Ag2–N1F <sup>i</sup>                   | 91.0(2)x2      |
| O2–Eu1–O32  | 82.4(3)        | N1E–Ag2–N1E <sup>i</sup>                  | 103.4(3)       | O2–Tb1–O21' | 113.4(5)       | N1E <sup>i</sup> –Ag2–N1E                  | 103.3(2)       |
| O2–Eu1–O32' | 81.9(5)        | N1F <sup>i</sup> –Ag2–N1F                 | 163.1(3)       | O2–Tb1–O22  | 67.0(3)        | N1F <sup>i</sup> –Ag2–N1F                  | 162.1(3)       |
| O2–Eu1–O41  | 116.7(2)       | N1O <sup>ii</sup> –Ag3–N1I                | 101.5(3)       | O2–Tb1–O22' | 70.1(5)        | N1G <sup>iii</sup> –Ag3–N1J                | 175.2(2)       |
| O2–Eu1–O42  | 70.1(2)        | N1O <sup>ii</sup> –Ag3–N1J <sup>iii</sup> | 79.2(2)        | O2–Tb1–O31  | 129.9(2)       | N1H <sup>iii</sup> –Ag3–N1G <sup>iii</sup> | 78.7(2)        |
| O3–Eu2–O51  | 69.4(2)        | N1O <sup>ii</sup> –Ag3–N1G                | 95.7(2)        | O2–Tb1–O31' | 128.5(3)       | N1H <sup>iii</sup> –Ag3–N1I <sup>iii</sup> | 81.9(1)        |
| O3–Eu2–O52  | 117.0(2)       | N1O <sup>ii</sup> –Ag3–N1K <sup>ii</sup>  | 82.2(2)        | O2–Tb1–O32  | 81.8(2)        | N1H <sup>iii</sup> –Ag3–N1J                | 106.2(2)       |
| O3–Eu2–O71  | 70.4(4)        | N1O <sup>ii</sup> –Ag3–N1H                | 173.0(3)       | O2–Tb1–O32' | 81.2(3)        | N1H <sup>iii</sup> –Ag3–N1K                | 93.9(2)        |
| O3–Eu2–O71' | 71.3(5)        | N1I–Ag3–N1J <sup>ii</sup>                 | 96.8(2)        | O2–Tb1–O41  | 116.8(2)       | N1I <sup>iii</sup> –Ag3–N1G <sup>iii</sup> | 83.7(2)        |
| O3–Eu2–O72  | 119.8(3)       | N1I–Ag3–N1G                               | 83.6(2)        | O2–Tb1–O42  | 70.1(2)        | N1I <sup>iii</sup> –Ag3–N1J                | 96.9(2)        |
| O3–Eu2–O72' | 115.3(7)       | N1I–Ag3–N1K <sup>ii</sup>                 | 175.0(2)       | O3–Tb2–O4   | 148.3(1)       | N1I <sup>iii</sup> –Ag3–N1K                | 175.0(2)       |
| O3–Eu2–O61  | 79.0(2)        | N1G–Ag3–N1J <sup>ii</sup>                 | 174.8(3)       | O3–Tb2–O51  | 69.4(2)        | N1K–Ag3–N1G <sup>iii</sup>                 | 92.9(2)        |
| O3–Eu2–O61' | 80.2(3)        | N1K <sup>ii</sup> –Ag3–N1J <sup>ii</sup>  | 87.1(2)        | O3–Tb2–O52  | 116.5(2)       | N1K–Ag3–N1J                                | 86.8(2)        |
| O3–Eu2–O62  | 125.5(3)       | N1K <sup>ii</sup> –Ag3–N1G                | 92.7(2)        | O3–Tb2–O61  | 78.9(2)        | N1O–Ag3–N1G <sup>iii</sup>                 | 96.0(2)        |
| O3–Eu2–O62' | 126.1(4)       | N1H–Ag3–N1I                               | 81.8(2)        | O3–Tb2–O61' | 80.0(3)        | N1O–Ag3–N1H <sup>iii</sup>                 | 173.5(2)       |
| O3–Eu2–O81  | 77.6(2)        | N1H–Ag3–N1J <sup>ii</sup>                 | 106.7(2)       | O3–Tb2–O62  | 125.2(2)       | N1O–Ag3–N1I <sup>iii</sup>                 | 101.5(2)       |
| O3–Eu2–O82  | 77.5(2)        | N1H–Ag3–N1G                               | 78.5(2)        | O3–Tb2–O62' | 126.8(3)       | N1O–Ag3–N1J                                | 79.1(2)        |
| O3–Eu2–O4   | 148.2(2)       | N1H–Ag3–N1K <sup>ii</sup>                 | 94.2(2)        | O3–Tb2–O71  | 70.6(3)        | N1O–Ag3–N1K                                | 82.5(1)        |

|             |          |  |  |             |          |  |  |
|-------------|----------|--|--|-------------|----------|--|--|
| O4–Eu2–O51  | 115.6(2) |  |  | O3–Tb2–O71' | 70.9(4)  |  |  |
| O4–Eu2–O52  | 68.2(2)  |  |  | O3–Tb2–O72  | 118.0(4) |  |  |
| O4–Eu2–O61  | 132.1(3) |  |  | O3–Tb2–O72' | 119.9(3) |  |  |
| O4–Eu2–O61' | 130.7(3) |  |  | O3–Tb2–O81  | 77.3(1)  |  |  |
| O4–Eu2–O62  | 85.9(3)  |  |  | O3–Tb2–O82  | 77.1(1)  |  |  |
| O4–Eu2–O62' | 85.4(3)  |  |  | O4–Tb2–O51  | 116.3(2) |  |  |
| O4–Eu2–O71  | 110.4(8) |  |  | O4–Tb2–O52  | 67.9(2)  |  |  |
| O4–Eu2–O71' | 118.3(4) |  |  | O4–Tb2–O61  | 132.1(2) |  |  |
| O4–Eu2–O72  | 70.5(3)  |  |  | O4–Tb2–O61' | 130.7(3) |  |  |
| O4–Eu2–O72' | 67.9(3)  |  |  | O4–Tb2–O62  | 85.9 (2) |  |  |
| O4–Eu2–O81  | 73.9(2)  |  |  | O4–Tb2–O62' | 84.6(3)  |  |  |
| O4–Eu2–O82  | 74.1(2)  |  |  | O4–Tb2–O71  | 116.6(6) |  |  |
|             |          |  |  | O4–Tb2–O71' | 108.7(6) |  |  |
|             |          |  |  | O4–Tb2–O72  | 67.5(3)  |  |  |
|             |          |  |  | O4–Tb2–O72' | 71.7(5)  |  |  |
|             |          |  |  | O4–Tb2–O81  | 74.4(1)  |  |  |
|             |          |  |  | O4–Tb2–O82  | 74.6(1)  |  |  |

2·3MeCN: Symmetry code(s): (i)  $x, -y+1, -z+1$ ; (ii)  $-x+1/2, y+1/2, -z+3/2$ ; (iii)  $-x+3/2, y-1/2, -z+3/2$ ; (iv)  $-x+3/2, y+1/2, -z+3/2$ .

3·3MeCN: Symmetry code(s): (i)  $x, -y, -z+1$ ; (ii)  $x, -y+1, -z+1$ ; (iii)  $x, -y+2, -z+1$ ; (iv)  $-x+1/2, y-1/2, -z+3/2$ .

**Table S2.** Unit cell parameters of CPs (**1–4**)·3MeCN measured at 150 K.

| <b>Compound</b> | <b><i>a</i>, Å</b> | <b><i>b</i>, Å</b> | <b><i>c</i>, Å</b> | <b><i>α</i>, °</b> | <b><i>β</i>, °</b> | <b><i>γ</i>, °</b> | <b><i>V</i>, Å<sup>3</sup></b> |
|-----------------|--------------------|--------------------|--------------------|--------------------|--------------------|--------------------|--------------------------------|
| <b>1·3MeCN</b>  | 16.07              | 29.12              | 38.91              | 90                 | 90                 | 90                 | 18203                          |
| <b>2·3MeCN</b>  | 16.06              | 29.10              | 38.55              | 90                 | 90                 | 90                 | 18015                          |
| <b>3·3MeCN</b>  | 16.07              | 28.93              | 38.86              | 90                 | 90                 | 90                 | 18060                          |
| <b>4·3MeCN</b>  | 16.11              | 28.87              | 38.90              | 90                 | 90                 | 90                 | 18089                          |

**Table S3.** The room-temperature photoluminescence lifetimes of CPs **1–4** before ( $\tau_1$ ) and after ( $\tau_2$ ) irradiation at 312 nm for 3 hours. The lifetimes were measured by monitoring the emission lines of  $\text{Sm}^{3+}$  ( $^4\text{G}_{5/2} \rightarrow ^6\text{H}_{9/2}$ ),  $\text{Eu}^{3+}$  ( $^5\text{D}_0 \rightarrow ^7\text{F}_2$ ),  $\text{Tb}^{3+}$  ( $^5\text{D}_4 \rightarrow ^7\text{F}_5$ ), and  $\text{Dy}^{3+}$  ( $^4\text{F}_{9/2} \rightarrow ^6\text{H}_{13/2}$ ) ions at  $\lambda_{\text{ex}} = 320$  nm.

| <b>Compound</b>       | <b>1</b> | <b>2</b> | <b>3</b> | <b>4</b> |
|-----------------------|----------|----------|----------|----------|
| $\tau_1, \mu\text{s}$ | 90       | 777      | 772      | 56       |
| $\tau_2, \mu\text{s}$ | 96       | 801      | 796      | 59       |

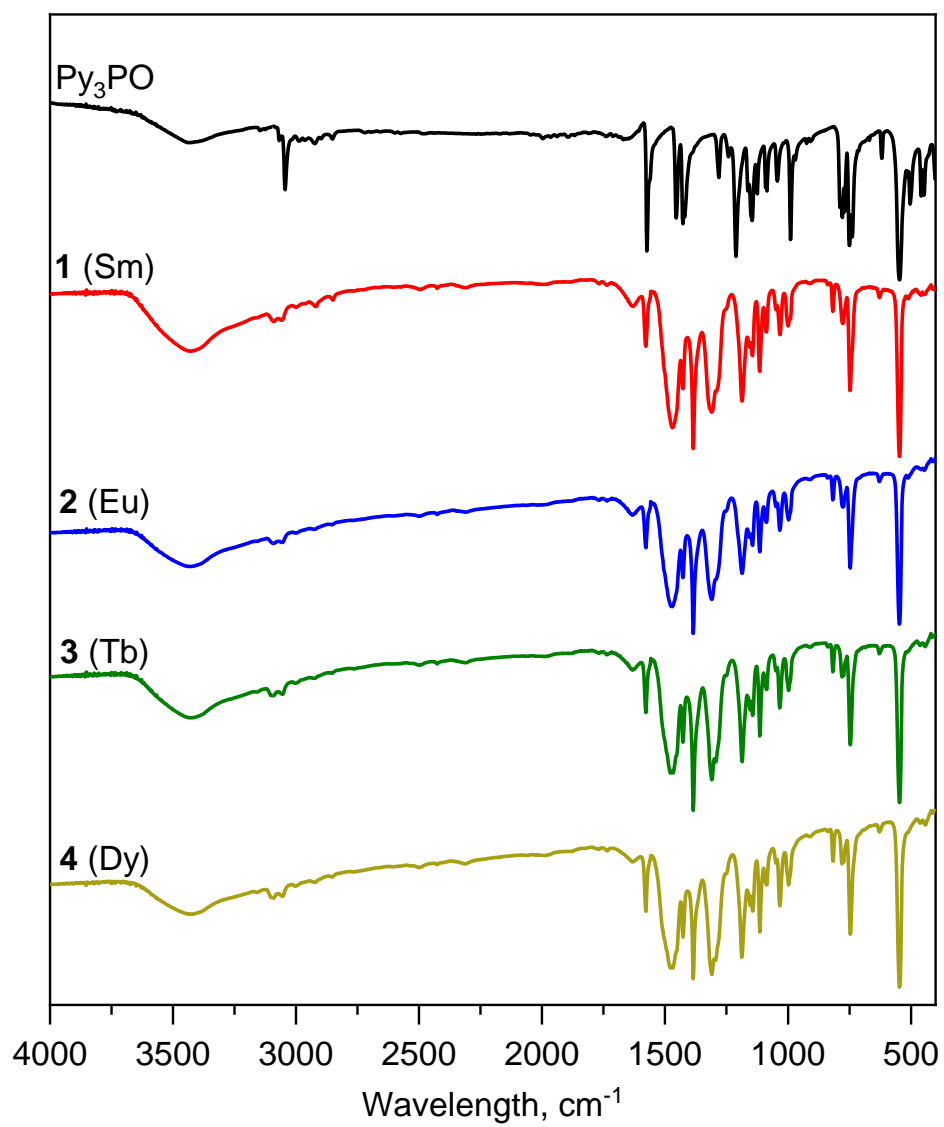

**Figure S1.** FT-IR spectra of Py<sub>3</sub>PO and CPs 1–4.



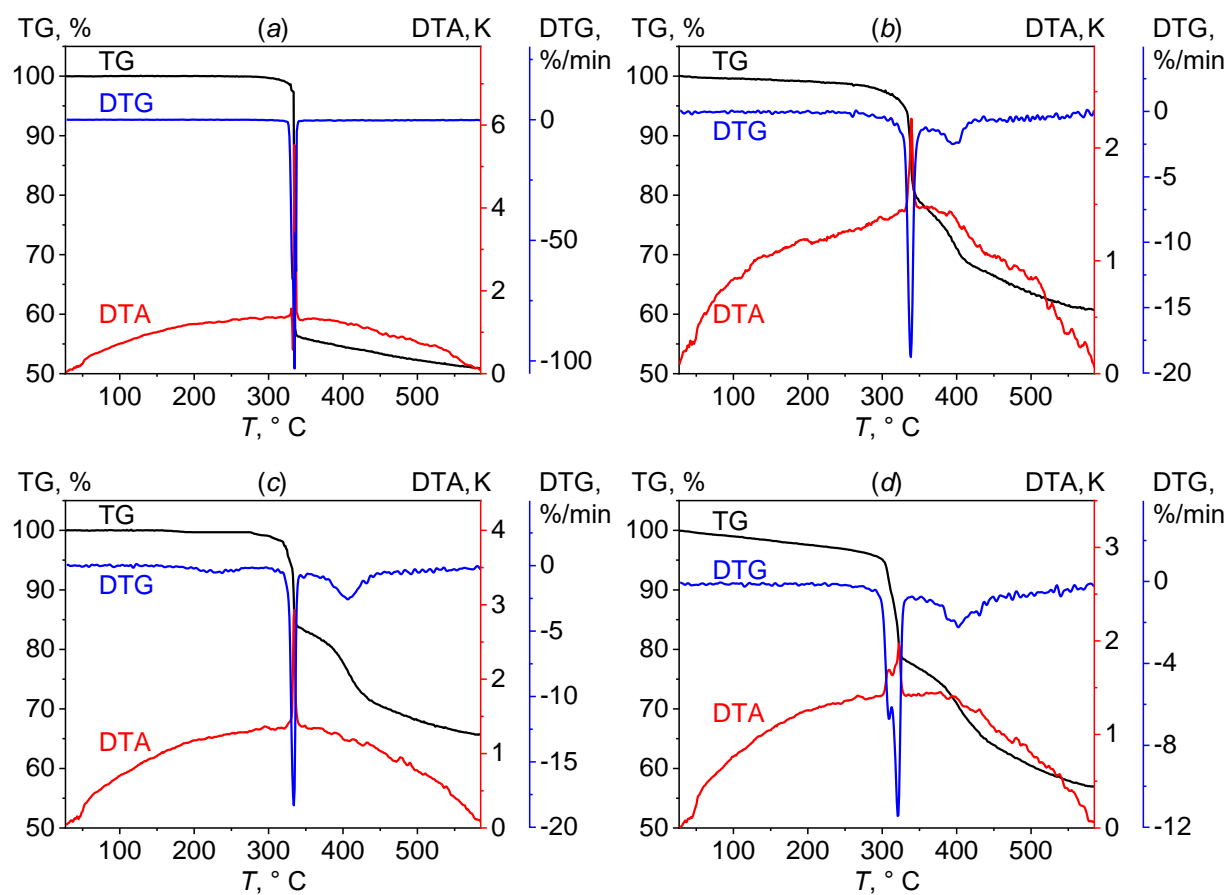

**Figure S2.** TG, DTA, and DTG of CPs **1** (a), **2** (b), **3** (c), and **4** (d).

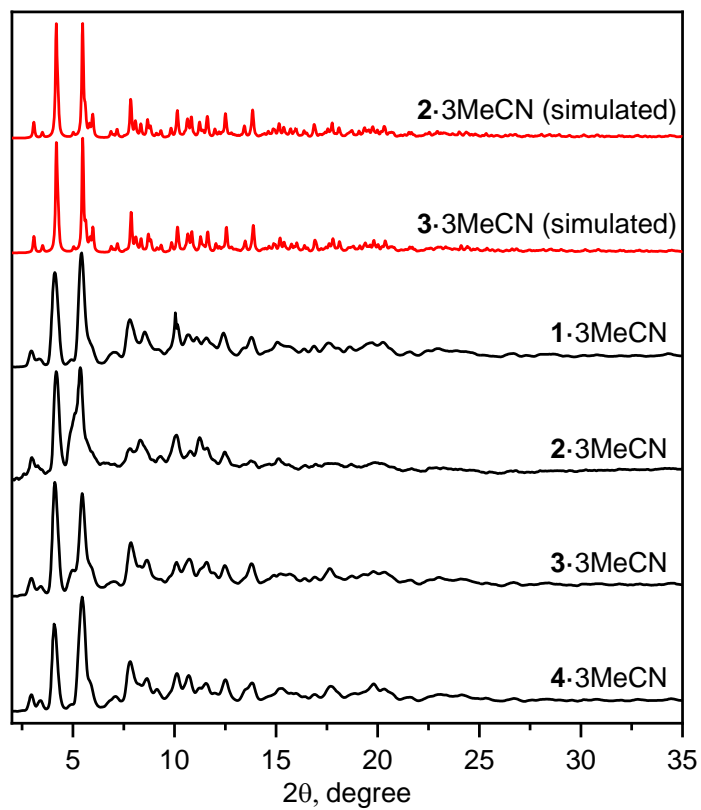

**Figure S3.** Simulated XRPD patterns of  $2 \cdot 3\text{MeCN}$  and  $3 \cdot 3\text{MeCN}$  (red) and experimental ones (black) of CPs ( $1-4$ ) $\cdot 3\text{MeCN}$  recorded at 150 K.

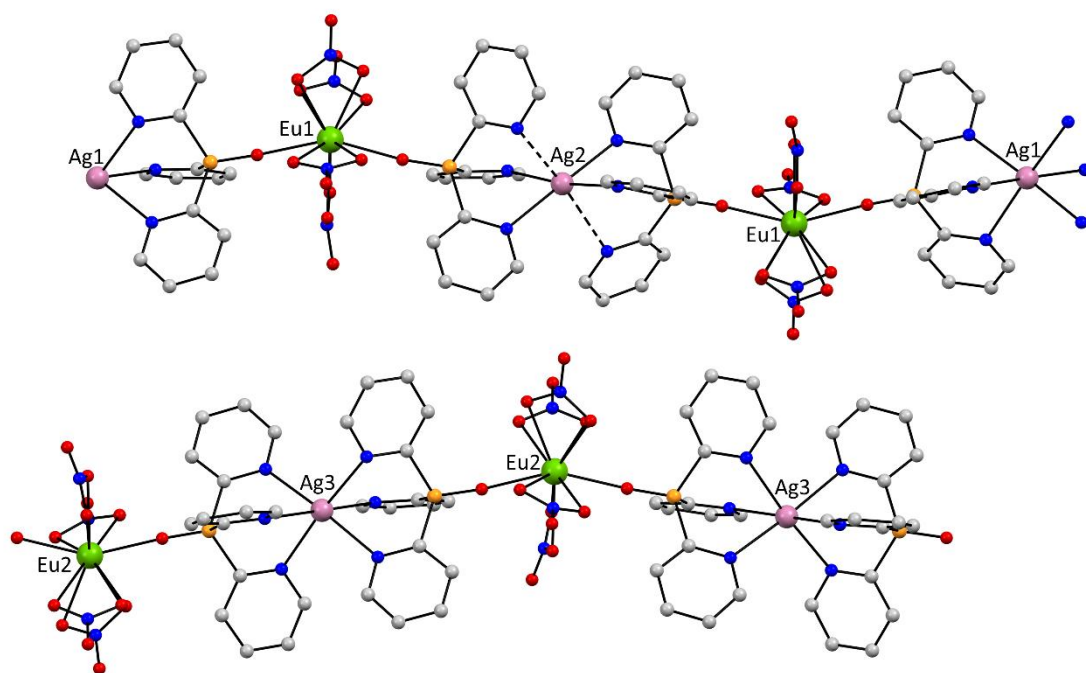

**Figure S4.** Fragment of the crystal structure of **2**·3MeCN. The longest Ag2–N bonds ( $d = 2.647$  Å) are shown by dashed lines. H atoms, disordered atom positions, and solvent MeCN molecules are omitted for clarity. Color code: Eu, green; Ag, pink; C, grey; O, red; N, blue; P, orange.

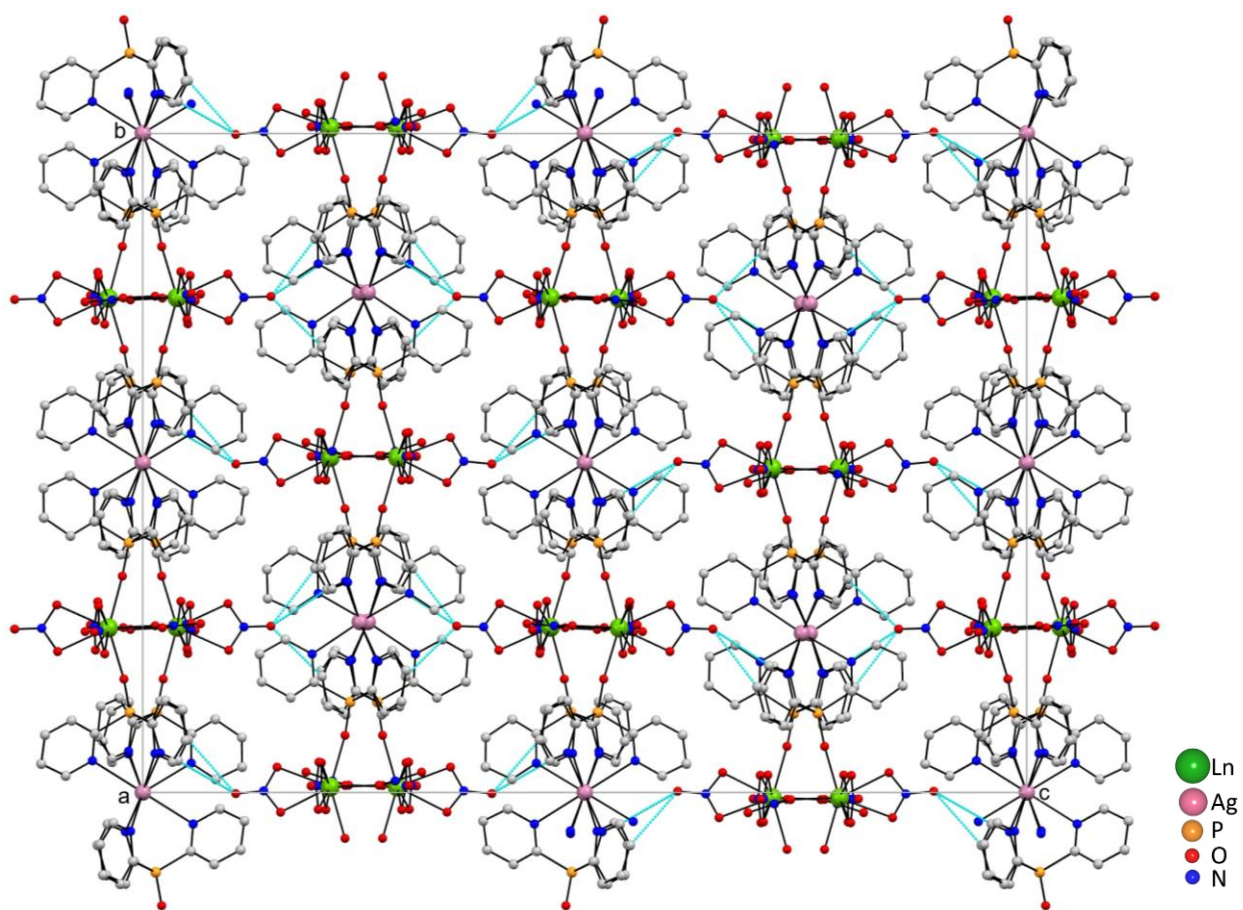

**Figure S5.** View of the crystal structure of 2·3MeCN along the [100] direction. H atoms, disordered atom positions, and solvent MeCN molecules are omitted for clarity. Short contacts are shown in cyan.

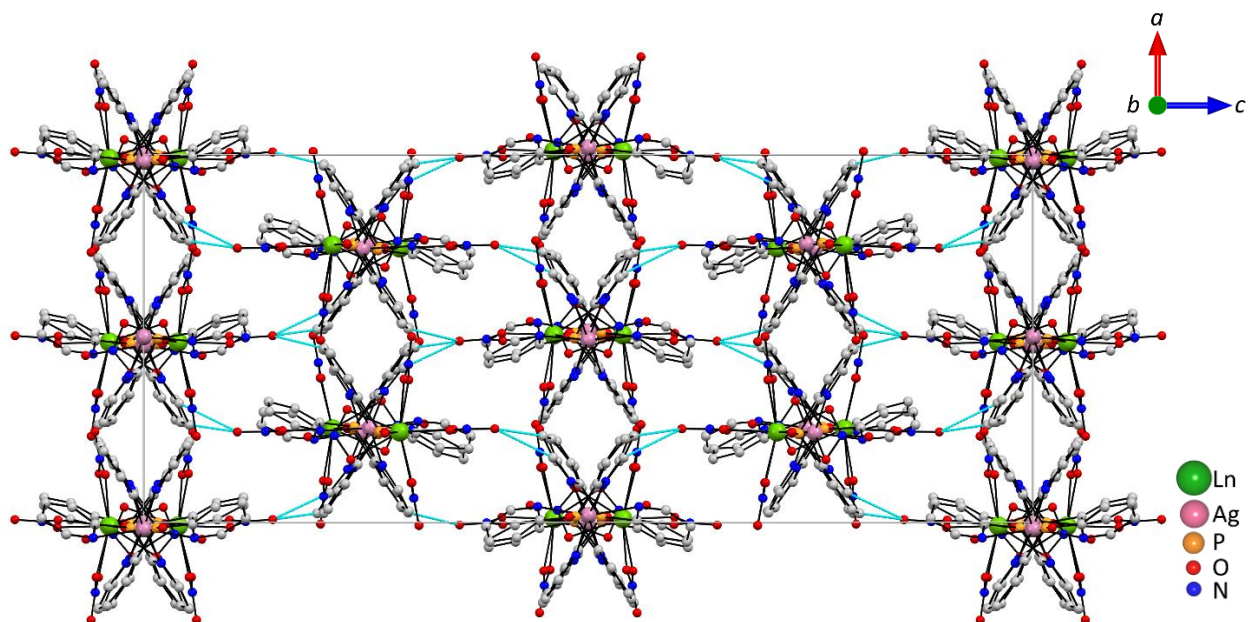

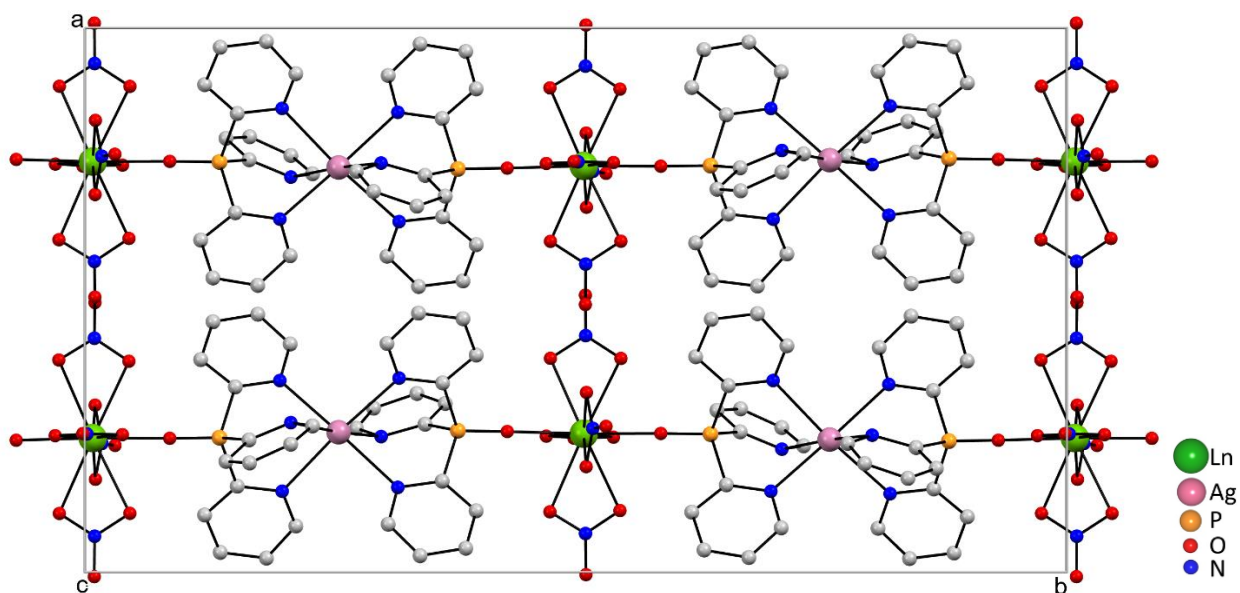

**Figure S7.** View of the crystal structure of **2**·3MeCN along the [001] direction. H atoms, disordered atom positions, and solvent MeCN molecules are omitted for clarity.

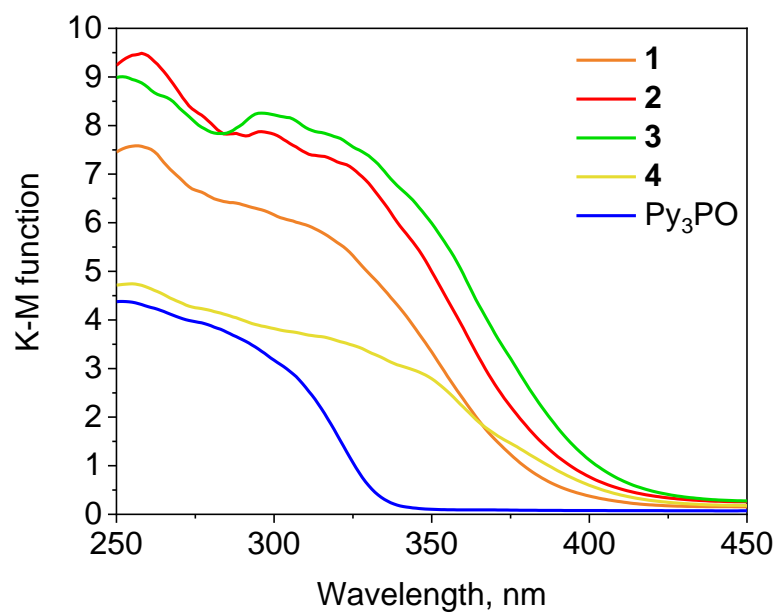

**Figure S8.** Diffuse reflectance spectra of CPs **1–4** and Py<sub>3</sub>PO presented as Kubelka-Munk function vs. wavelength. All measurements were performed at room temperature.

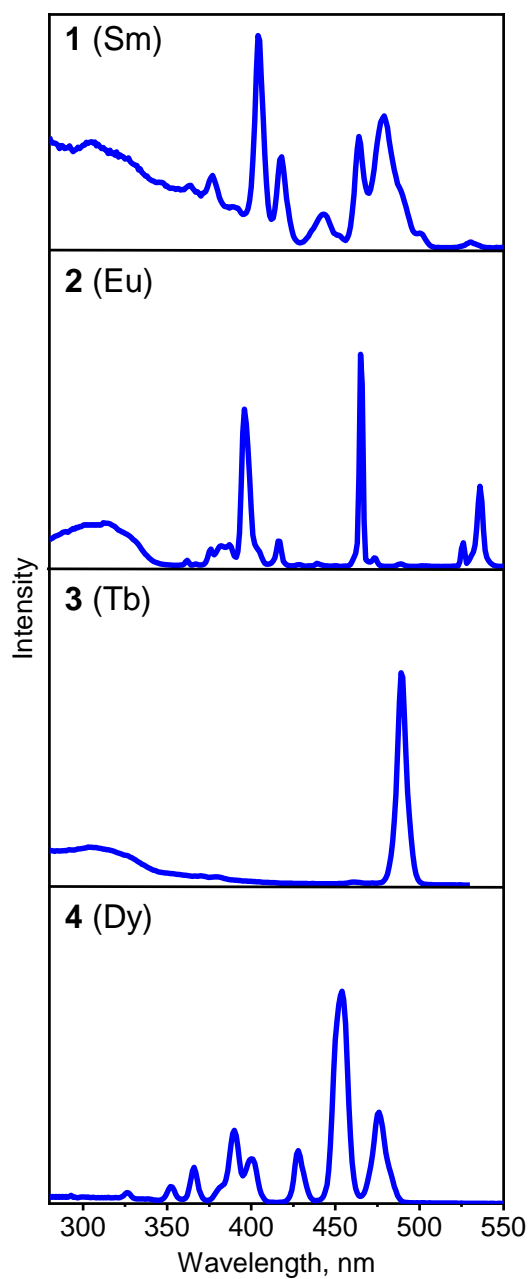

**Figure S9.** Normalized excitation spectra of CPs **1** ( $\lambda_{\text{reg}} = 640$  nm), **2** ( $\lambda_{\text{reg}} = 615$  nm), **3** ( $\lambda_{\text{reg}} = 545$  nm), and **4** ( $\lambda_{\text{reg}} = 573$  nm) in the solid state at 300 K.



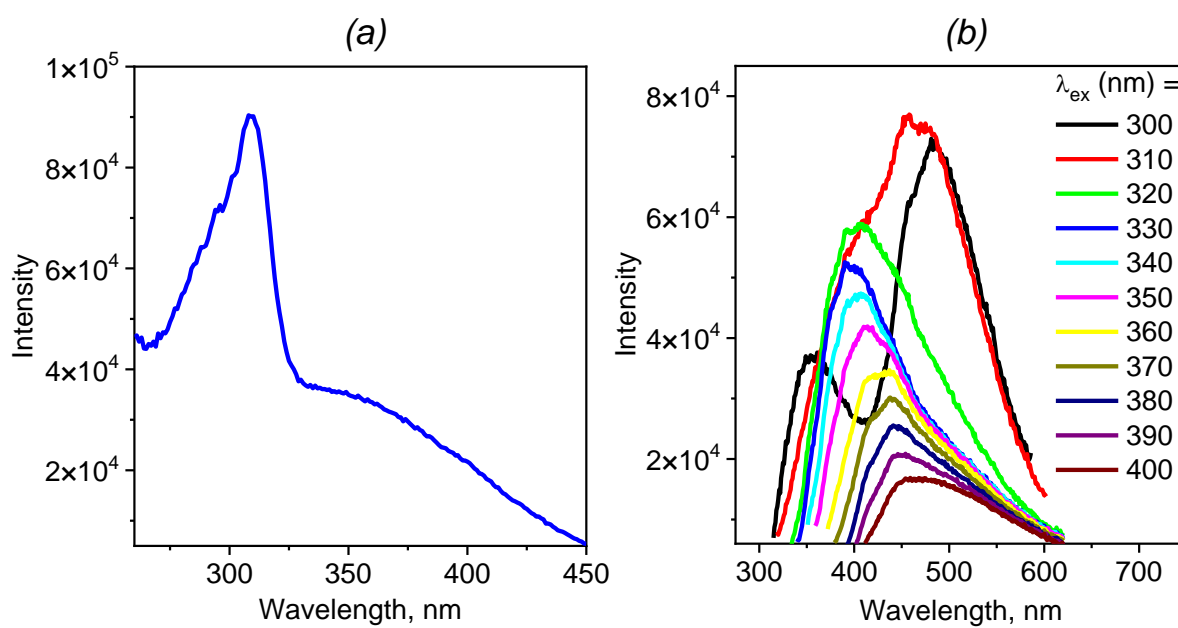

**Figure S10.** PL excitation spectrum at  $\lambda_{\text{reg}} = 480$  nm (a) and emission spectra recorded at different excitation wavelengths (b) of Py<sub>3</sub>PO in the solid state at 300 K.

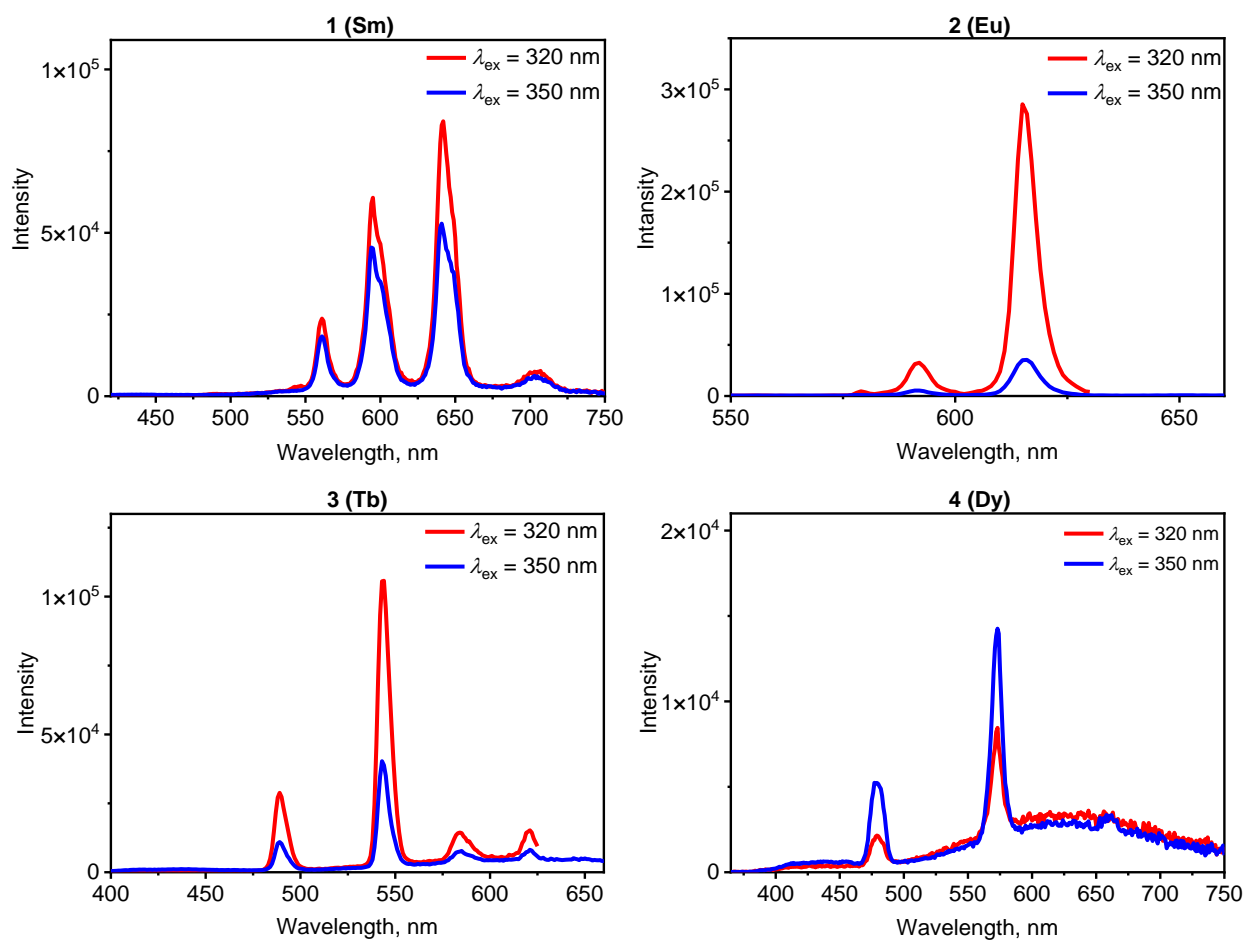

**Figure S11.** Emission spectra of CPs 1–4 recorded at  $\lambda_{\text{ex}} = 320$  nm (red) and 350 nm (blue) in the solid state at 300 K.

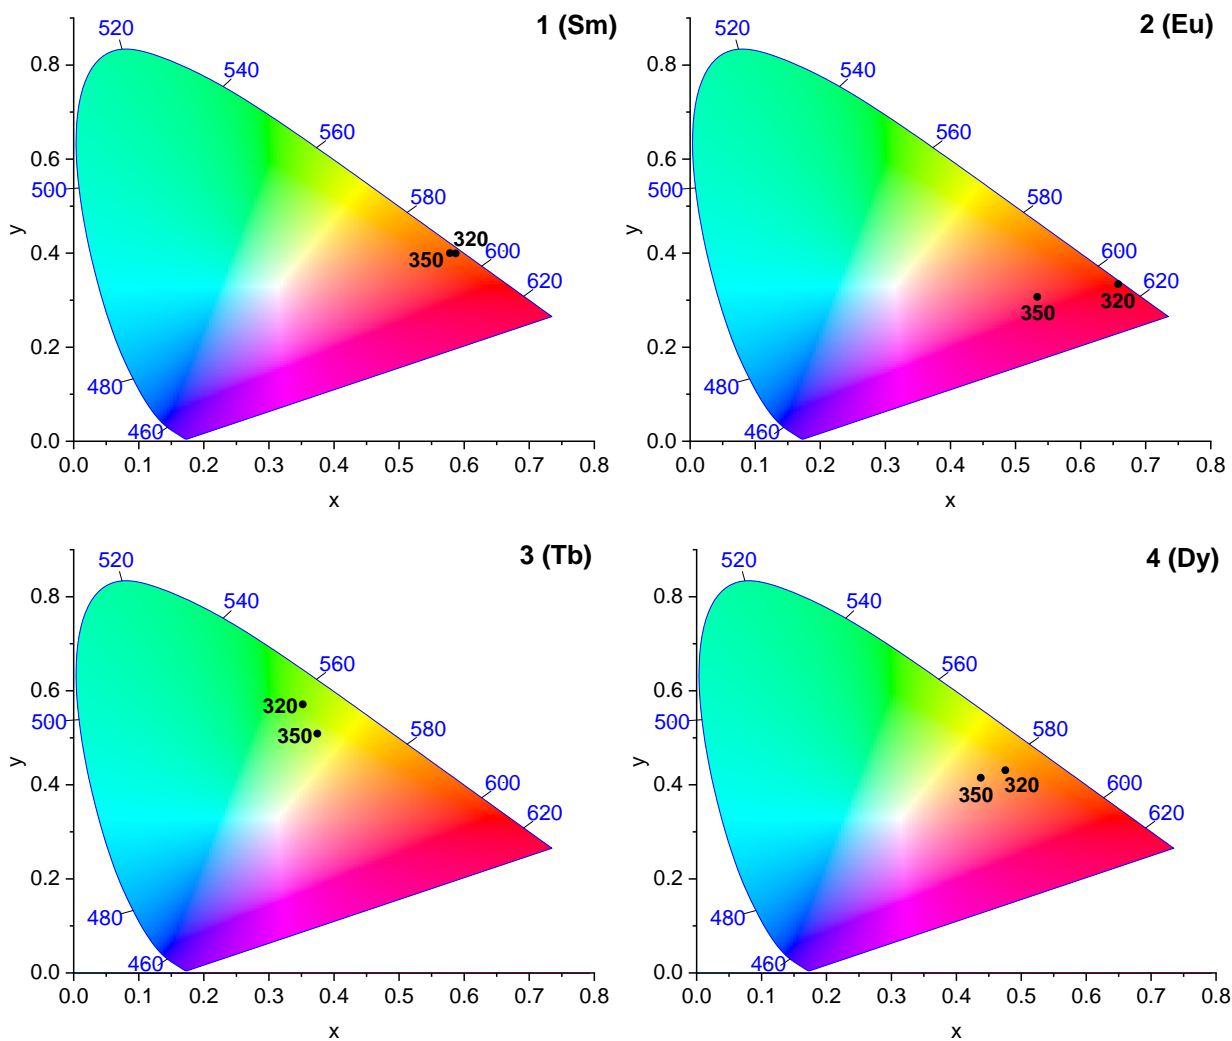

**Figure S12.** CIE 1931 chromaticity diagrams demonstrating dependence of the emission color of CPs 1–4 on the excitation wavelength.

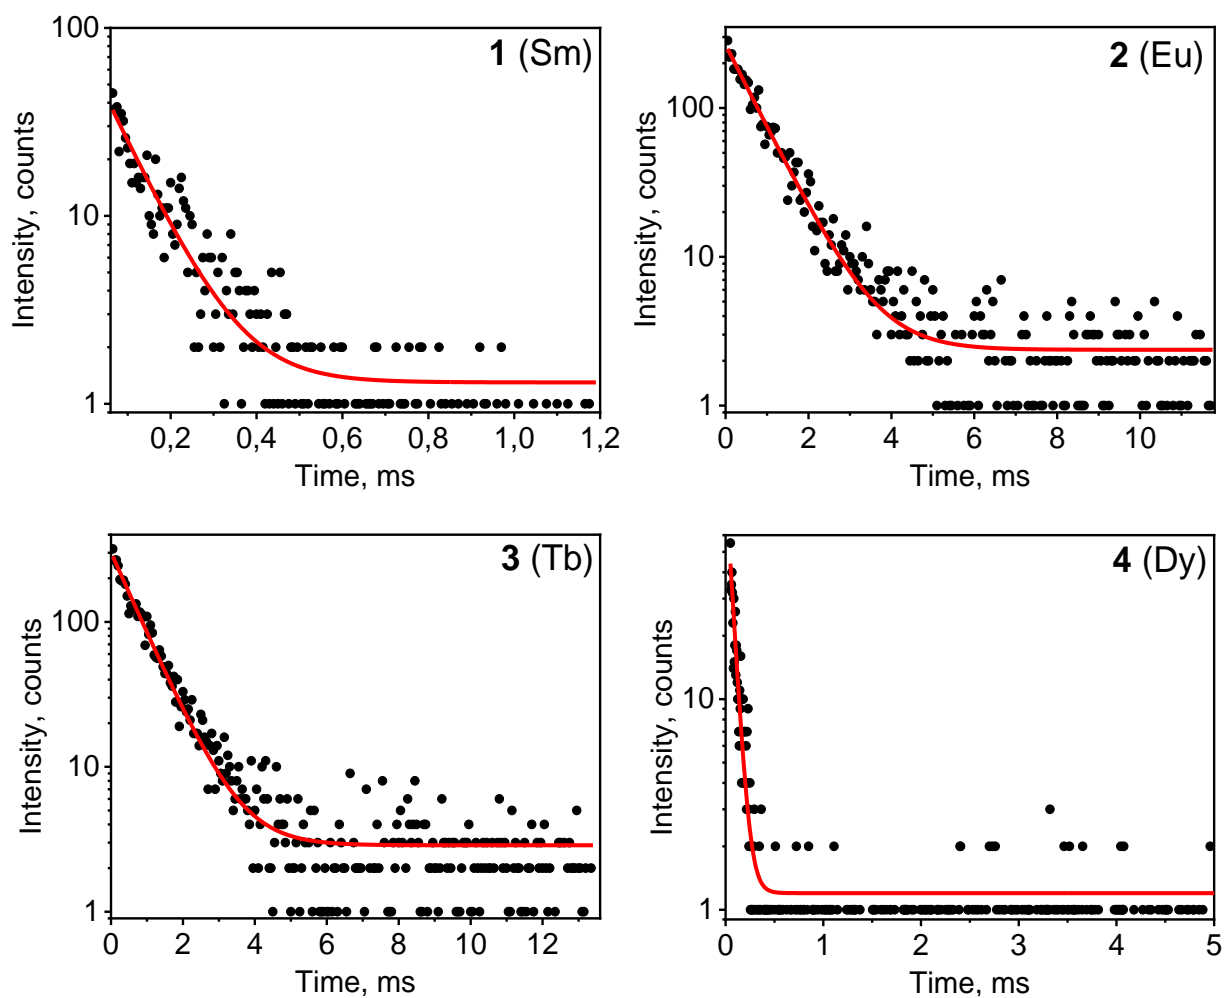

**Figure S13.** Kinetics of PL decay of CPs **1** ( $\lambda_{\text{reg}} = 640$  nm), **2** ( $\lambda_{\text{reg}} = 615$  nm), **3** ( $\lambda_{\text{reg}} = 545$  nm), and **4** ( $\lambda_{\text{reg}} = 573$  nm) in the solid state at 300 K. The PL was excited at 320 nm.

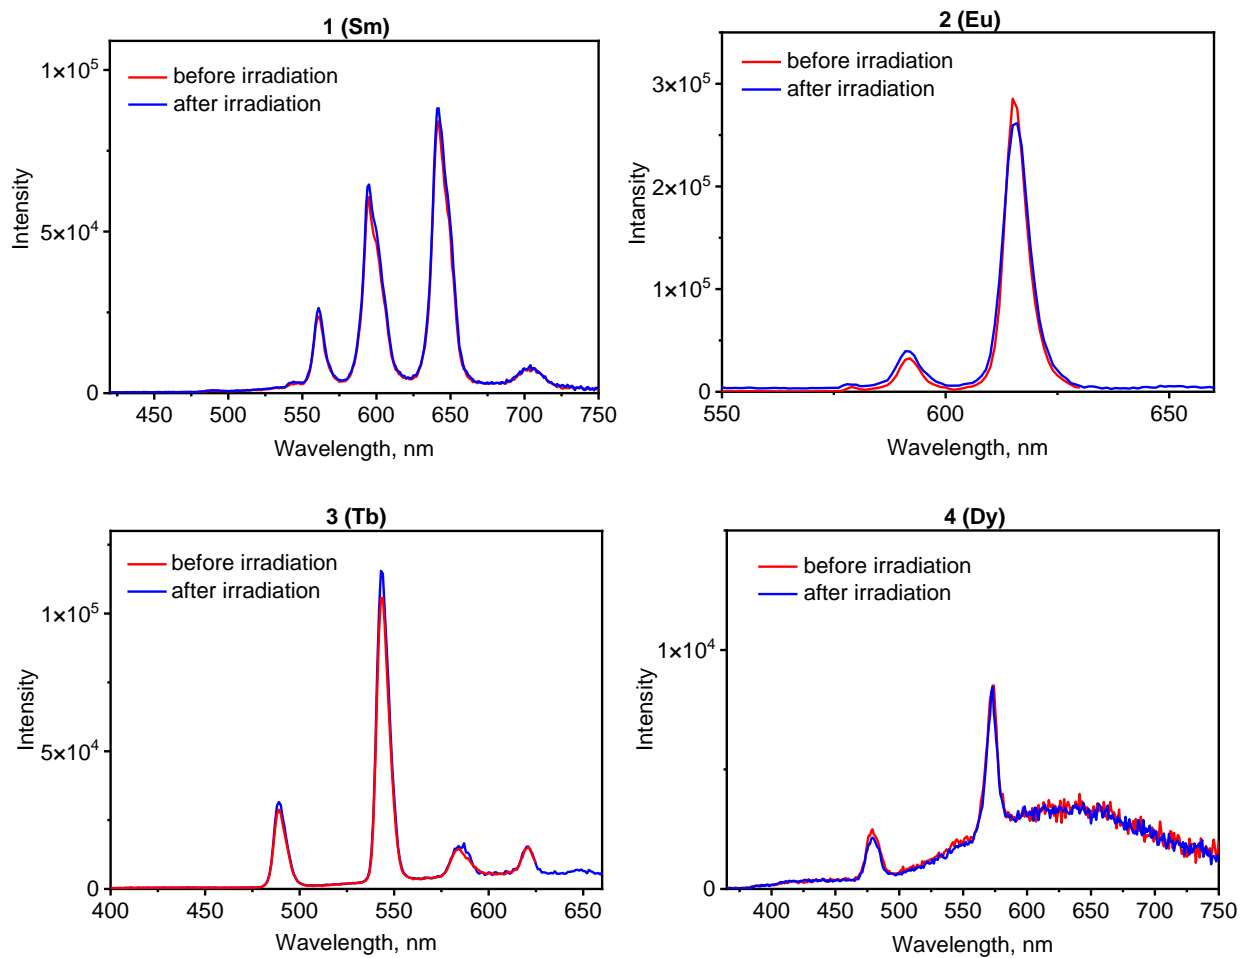

**Figure S14.** Emission spectra of CPs 1–4 before (red) and after (blue) irradiation at 312 nm for 3 hours recorded at  $\lambda_{\text{ex}} = 320$  nm in the solid state at 300 K.
